# Supplementary material
Source: PubMed Central journal article supplement (PMC4790794)
Supplement: denj009152.wt1_default.pdf [file denj009152.wt1_default.pdf]

**Supplementary Table 1.** ICD-9/-10 codes used to identify cycling injury hospitalizations.

| ICD Code                                          | Description                                                |
|---------------------------------------------------|------------------------------------------------------------|
| ICD-9                                             |                                                            |
| E800-E807(.3)                                     | Railway accidents – injured pedal cyclist                  |
| E810-E816, E818-E819(.6)                          | Motor Vehicle Traffic Accidents – injured pedal cyclist    |
| E820-E825(.6)                                     | Motor vehicle nontraffic accidents – injured pedal cyclist |
| E826-E829(.1)                                     | Other Road vehicle accidents – injured pedal cyclist       |
| ICD-10-CA                                         |                                                            |
| V10-V19 (including all fourth digit subdivisions) | Pedal cyclist injured in transport accident                |

**Supplementary Table 2.** ICD-9/-10 codes used to identify head injuries. Head injury diagnosis codes were selected based on the Canadian Institute for Health Information’s definition of head injuries<sup>(1)</sup> and the Centres for Disease Control’s definition of traumatic brain injury.<sup>(2)</sup>

| ICD Code       | Definition                                                      | Brain Injury | Scalp/Skull Injury | Face Injury |
|----------------|-----------------------------------------------------------------|--------------|--------------------|-------------|
| <b>ICD-9</b>   |                                                                 |              |                    |             |
| <b>800-804</b> | <b>FRACTURE OF SKULL</b>                                        |              |                    |             |
| <b>800</b>     | <b>Fracture of vault of skull</b>                               |              |                    |             |
| 800.0          | Closed without mention of intracranial injury                   |              | ✓                  |             |
| 800.1          | Closed with cerebral laceration and contusion                   | ✓            |                    |             |
| 800.2          | Closed with subarachnoid, subdural, and extradural hemorrhage   | ✓            |                    |             |
| 800.3          | Closed with other and unspecified intracranial hemorrhage       | ✓            |                    |             |
| 800.4          | Closed with intracranial injury of other and unspecified nature | ✓            |                    |             |
| 800.5          | Open without mention of intracranial injury                     |              | ✓                  |             |
| 800.6          | Open with cerebral laceration and contusion                     | ✓            |                    |             |
| 800.7          | Open with subarachnoid, subdural, and extradural hemorrhage     | ✓            |                    |             |
| 800.8          | Open with other and unspecified intracranial hemorrhage         | ✓            |                    |             |
| 800.9          | Open with intracranial injury of other and unspecified nature   | ✓            |                    |             |
| <b>801</b>     | <b>Fracture of base of skull</b>                                |              |                    |             |
| 801.0          | Closed without mention of intracranial injury                   |              | ✓                  |             |
| 801.1          | Closed with cerebral laceration and contusion                   | ✓            |                    |             |
| 801.2          | Closed with subarachnoid, subdural, and extradural hemorrhage   | ✓            |                    |             |
| 801.3          | Closed with other and unspecified intracranial hemorrhage       | ✓            |                    |             |
| 801.4          | Closed with intracranial injury of other and unspecified nature | ✓            |                    |             |
| 801.5          | Open without mention of intracranial injury                     |              | ✓                  |             |
| 801.6          | Open with cerebral laceration and contusion                     | ✓            |                    |             |
| 801.7          | Open with subarachnoid, subdural, and extradural hemorrhage     | ✓            |                    |             |
| 801.8          | Open with other and unspecified intracranial hemorrhage         | ✓            |                    |             |
| 801.9          | Open with intracranial injury of other and unspecified nature   | ✓            |                    |             |
| <b>802</b>     | <b>Fracture of face bones</b>                                   |              |                    |             |

| ICD Code   | Definition                                                         | Brain Injury | Scalp/Skull Injury | Face Injury |
|------------|--------------------------------------------------------------------|--------------|--------------------|-------------|
| 802.0      | Nasal bones, closed                                                |              |                    | ✓           |
| 802.1      | Nasal bones, open                                                  |              |                    | ✓           |
| 802.2      | Mandible, closed                                                   |              |                    | ✓           |
| 802.3      | Mandible, open                                                     |              |                    | ✓           |
| 802.4      | Malar and maxillary bones, closed                                  |              |                    | ✓           |
| 802.5      | Malar and maxillary bones, open                                    |              |                    | ✓           |
| 802.6      | Orbital floor (blow-out), closed                                   |              |                    | ✓           |
| 802.7      | Orbital floor (blow-out), open                                     |              |                    | ✓           |
| 802.8      | Other facial bones, closed                                         |              |                    | ✓           |
| 802.9      | Other facial bones, open                                           |              |                    | ✓           |
| <b>803</b> | <b>Other and unqualified skull fractures</b>                       |              |                    |             |
| 803.0      | Closed without mention of intracranial injury                      |              | ✓                  |             |
| 803.1      | Closed with cerebral laceration and contusion                      | ✓            |                    |             |
| 803.2      | Closed with subarachnoid, subdural, and extradural hemorrhage      | ✓            |                    |             |
| 803.3      | Closed with other and unspecified intracranial hemorrhage          | ✓            |                    |             |
| 803.4      | Closed with intracranial injury of other and unspecified nature    | ✓            |                    |             |
| 803.5      | Open without mention of intracranial injury                        |              | ✓                  |             |
| 803.6      | Open with cerebral laceration and contusion                        | ✓            |                    |             |
| 803.7      | Open with subarachnoid, subdural, and extradural hemorrhage        | ✓            |                    |             |
| 803.8      | Open with other and unspecified intracranial hemorrhage            | ✓            |                    |             |
| 803.9      | Open with intracranial injury of other and unspecified nature      | ✓            |                    |             |
| <b>804</b> | <b>Multiple fractures involving skull or face with other bones</b> |              |                    |             |
| 804.0      | Closed without mention of intracranial injury                      |              | ✓                  |             |
| 804.1      | Closed with cerebral laceration and contusion                      | ✓            |                    |             |
| 804.2      | Closed with subarachnoid, subdural, and extradural hemorrhage      | ✓            |                    |             |
| 804.3      | Closed with other and unspecified intracranial hemorrhage          | ✓            |                    |             |
| 804.4      | Closed with intracranial injury of other and unspecified nature    | ✓            |                    |             |
| 804.5      | Open without mention of intracranial injury                        |              | ✓                  |             |
| 804.6      | Open with cerebral laceration and contusion                        | ✓            |                    |             |
| 804.7      | Open with subarachnoid, subdural, and extradural hemorrhage        | ✓            |                    |             |
| 804.8      | Open with other and unspecified intracranial hemorrhage            | ✓            |                    |             |

| ICD Code       | Definition                                                                                          | Brain Injury | Scalp/Skull Injury | Face Injury |
|----------------|-----------------------------------------------------------------------------------------------------|--------------|--------------------|-------------|
| 804.9          | Open with intracranial injury of other and unspecified nature                                       | ✓            |                    |             |
| <b>850-854</b> | <b>INTRACRANIAL INJURY, EXCLUDING THOSE WITH SKULL FRACTURE</b>                                     |              |                    |             |
| <b>850</b>     | <b>Concussion</b>                                                                                   |              |                    |             |
| 850.0          | With no loss of consciousness                                                                       | ✓            |                    |             |
| 850.1          | With brief loss of consciousness                                                                    | ✓            |                    |             |
| 850.11         | With loss of consciousness of 30 minutes or less                                                    | ✓            |                    |             |
| 850.12         | With loss of consciousness from 31 to 59 minutes                                                    | ✓            |                    |             |
| 850.2          | With moderate loss of consciousness                                                                 | ✓            |                    |             |
| 850.3          | With prolonged loss of consciousness and return to pre-existing conscious level                     | ✓            |                    |             |
| 850.4          | With prolonged loss of consciousness, without return to pre-existing conscious level                | ✓            |                    |             |
| 850.5          | With loss of consciousness of unspecified duration                                                  | ✓            |                    |             |
| 850.9          | Concussion, unspecified                                                                             | ✓            |                    |             |
| <b>851</b>     | <b>Cerebral laceration and contusion</b>                                                            |              |                    |             |
| 851.0          | Cortex (cerebral) contusion without mention of open intracranial wound                              | ✓            |                    |             |
| 851.1          | Cortex (cerebral) contusion with open intracranial wound                                            | ✓            |                    |             |
| 851.2          | Cortex (cerebral) laceration without mention of open intracranial wound                             | ✓            |                    |             |
| 851.3          | Cortex (cerebral) laceration with open intracranial wound                                           | ✓            |                    |             |
| 851.4          | Cerebellar or brain stem contusion without mention of open intracranial wound                       | ✓            |                    |             |
| 851.5          | Cerebellar or brain stem contusion with open intracranial wound                                     | ✓            |                    |             |
| 851.6          | Cerebellar or brain stem laceration without mention of open intracranial wound                      | ✓            |                    |             |
| 851.7          | Cerebellar or brain stem laceration with open intracranial wound                                    | ✓            |                    |             |
| 851.8          | Other and unspecified cerebral laceration and contusion, without mention of open intracranial wound | ✓            |                    |             |
| 851.9          | Other and unspecified cerebral laceration and contusion, with open intracranial wound               | ✓            |                    |             |
| <b>852</b>     | <b>Subarachnoid, subdural, and extradural hemorrhage, following injury</b>                          |              |                    |             |
| 852.0          | Subarachnoid hemorrhage following injury without mention of open intracranial wound                 | ✓            |                    |             |
| 852.1          | Subarachnoid hemorrhage following injury with open intracranial wound                               | ✓            |                    |             |

| ICD Code   | Definition                                                                        | Brain Injury | Scalp/Skull Injury | Face Injury |
|------------|-----------------------------------------------------------------------------------|--------------|--------------------|-------------|
| 852.2      | Subdural hemorrhage following injury without mention of open intracranial wound   | ✓            |                    |             |
| 852.3      | Subdural hemorrhage following injury with open intracranial wound                 | ✓            |                    |             |
| 852.4      | Extradural hemorrhage following injury without mention of open intracranial wound | ✓            |                    |             |
| 852.5      | Extradural hemorrhage following injury with open intracranial wound               | ✓            |                    |             |
| <b>853</b> | <b>Other and unspecified intracranial hemorrhage following injury</b>             |              |                    |             |
| 853.0      | Without mention of open intracranial wound                                        | ✓            |                    |             |
| 853.1      | With open intracranial wound                                                      | ✓            |                    |             |
| <b>854</b> | <b>Intracranial injury of other and unspecified nature</b>                        |              |                    |             |
| 854.0      | Without mention of open intracranial wound                                        | ✓            |                    |             |
| 854.1      | With open intracranial wound                                                      | ✓            |                    |             |
| <b>959</b> | <b>Injury, other and unspecified</b>                                              |              |                    |             |
| 959.01     | Head injury, unspecified                                                          |              | ✓                  |             |
| <b>870</b> | <b>Open wound of ocular adnexa</b>                                                |              |                    |             |
| 870.0      | Laceration of skin of eyelid and periocular area                                  |              |                    | ✓           |
| 870.1      | Laceration of eyelid, full-thickness, not involving lacrimal passages             |              |                    | ✓           |
| 870.2      | Laceration of eyelid involving lacrimal passages                                  |              |                    | ✓           |
| 870.3      | Penetrating wound of orbit, without mention of foreign body                       |              |                    | ✓           |
| 870.4      | Penetrating wound of orbit with foreign body                                      |              |                    | ✓           |
| 870.8      | Other specified open wounds of ocular adnexa                                      |              |                    | ✓           |
| 870.9      | Unspecified open wound of ocular adnexa                                           |              |                    | ✓           |
| <b>871</b> | <b>Open wound of eyeball</b>                                                      |              |                    |             |
| 871.0      | Ocular laceration without prolapse of intraocular tissue                          |              |                    | ✓           |
| 871.1      | Ocular laceration with prolapse or exposure of intraocular tissue                 |              |                    | ✓           |
| 871.2      | Rupture of eye with partial loss of intraocular tissue                            |              |                    | ✓           |
| 871.3      | Avulsion of eye                                                                   |              |                    | ✓           |
| 871.4      | Unspecified laceration of eye                                                     |              |                    | ✓           |
| 871.5      | Penetration of eyeball with magnetic foreign body                                 |              |                    | ✓           |
| 871.6      | Penetration of eyeball with (nonmagnetic) foreign body                            |              |                    | ✓           |
| 871.7      | Unspecified ocular penetration                                                    |              |                    | ✓           |
| 871.9      | Unspecified open wound of eyeball                                                 |              |                    | ✓           |
| <b>872</b> | <b>Open wound of ear</b>                                                          |              |                    |             |
| 872.0      | External ear, without mention of complication                                     |              |                    | ✓           |
| 872.1      | External ear, complicated                                                         |              |                    | ✓           |
| 872.6      | Other specified parts of ear, without mention of complication                     |              |                    | ✓           |

| ICD Code   | Definition                                                               | Brain Injury | Scalp/Skull Injury | Face Injury |
|------------|--------------------------------------------------------------------------|--------------|--------------------|-------------|
| 872.7      | Other specified parts of ear, complicated                                |              |                    | ✓           |
| 872.8      | Ear, part unspecified, without mention of complication                   |              |                    | ✓           |
| 872.9      | Ear, part unspecified, complicated                                       |              |                    | ✓           |
| <b>873</b> | <b>Other open wound of head</b>                                          |              |                    |             |
| 873.0      | Scalp, without mention of complication                                   |              | ✓                  |             |
| 873.1      | Scalp, complicated                                                       |              | ✓                  |             |
| 873.2      | Nose, without mention of complication                                    |              |                    | ✓           |
| 873.3      | Nose, complicated                                                        |              |                    | ✓           |
| 873.4      | Face, without mention of complication                                    |              |                    | ✓           |
| 873.5      | Face, complicated                                                        |              |                    | ✓           |
| 873.6      | Internal structures of mouth, without mention of complication            |              |                    | ✓           |
| 873.7      | Internal structures of mouth, complicated                                |              |                    | ✓           |
| 873.8      | Other and unspecified open wound of head without mention of complication |              | ✓                  |             |
| 873.9      | Other and unspecified open wound of head, complicated                    |              | ✓                  |             |
| <b>925</b> | <b>Crushing injury of face, scalp and neck</b>                           |              |                    |             |
| 925.1      | Crushing injury of face and scalp                                        |              | ✓                  |             |
| ICD-10     |                                                                          |              |                    |             |
| <b>S01</b> | <b>Open wound of head</b>                                                |              |                    |             |
| S01.0      | Open wound of scalp                                                      |              | ✓                  |             |
| S01.1      | Open wound of eyelid and periocular area                                 |              |                    | ✓           |
| S01.2      | Open wound of nose                                                       |              |                    | ✓           |
| S01.3      | Open wound of ear                                                        |              |                    | ✓           |
| S01.4      | Open wound of cheek and temporomandibular area                           |              |                    | ✓           |
| S01.5      | Open wound of lip and oral cavity                                        |              |                    | ✓           |
| S01.7      | Multiple open wounds of head                                             |              | ✓                  |             |
| S01.8      | Open wound of other parts of head                                        |              | ✓                  |             |
| S01.9      | Open wound of head, part unspecified                                     |              | ✓                  |             |
| S01.10     | Open wound of eyelid and periocular area                                 |              |                    | ✓           |
| <b>S02</b> | <b>Fracture of skull and facial bones</b>                                |              |                    |             |
| S02.0      | Fracture of vault of skull                                               |              | ✓                  |             |
| S02.1      | Fracture of base of skull                                                |              | ✓                  |             |
| S02.2      | Fracture of nasal bones                                                  |              |                    | ✓           |
| S02.3      | Fracture of orbital floor                                                |              |                    | ✓           |
| S02.4      | Fracture of malar and maxillary bones                                    |              |                    | ✓           |
| S02.5      | Fracture of tooth                                                        |              |                    | ✓           |
| S02.6      | Fracture of mandible                                                     |              |                    | ✓           |
| S02.7      | Multiple fractures involving skull and facial bones                      |              | ✓                  |             |
| S02.8      | Fractures of other skull and facial bones                                |              | ✓                  |             |
| S02.9      | Fracture of skull and facial bones, part unspecified                     |              | ✓                  |             |
| <b>S06</b> | <b>Intracranial injury</b>                                               |              |                    |             |

| ICD Code   | Definition                                       | Brain Injury | Scalp/Skull Injury | Face Injury |
|------------|--------------------------------------------------|--------------|--------------------|-------------|
| S06.0      | Concussion                                       | ✓            |                    |             |
| S06.1      | Traumatic cerebral oedema                        | ✓            |                    |             |
| S06.2      | Diffuse brain injury                             | ✓            |                    |             |
| S06.3      | Focal brain injury                               | ✓            |                    |             |
| S06.4      | Epidural haemorrhage                             | ✓            |                    |             |
| S06.5      | Traumatic subdural haemorrhage                   | ✓            |                    |             |
| S06.6      | Traumatic subarachnoid haemorrhage               | ✓            |                    |             |
| S06.7      | Intracranial injury with prolonged coma          | ✓            |                    |             |
| S06.8      | Other intracranial injuries                      | ✓            |                    |             |
| S06.9      | Intracranial injury, unspecified                 | ✓            |                    |             |
| <b>S07</b> | <b>Crushing injury of face</b>                   |              |                    |             |
| S07.0      | Crushing injury of skull                         |              | ✓                  |             |
| S07.1      | Crushing injury of other parts of head           |              | ✓                  |             |
| S07.8      | Crushing injury of head, part unspecified        |              | ✓                  |             |
| S07.9      | Crushing injury of face                          |              |                    | ✓           |
| <b>S09</b> | <b>Other and unspecified injuries of head</b>    |              |                    |             |
| S09.7      | Multiple injuries of head                        |              | ✓                  |             |
| S09.8      | Other specified injuries of head                 |              | ✓                  |             |
| S09.9      | Unspecified injury of head                       |              | ✓                  |             |
| <b>T02</b> | <b>Fractures involving multiple body regions</b> |              |                    |             |
| T02.0      | Fractures involving head with neck               |              | ✓                  |             |

## REFERENCES

1. Head Injuries in Canada: A Decade of Change (1994-1995 to 2003-2004). Canadian Institute of Health Information; 2006.
2. Faul M, Xu L, Wald M, Coronado V. Traumatic Brain Injury in the United States: Emergency Department Visits, Hospitalizations and Deaths 2002-2006. [Internet]. Atlanta (GA): Centers for Disease Control and Prevention, National Center for Injury Prevention and Control; 2010. Available from: <http://www.cdc.gov/TraumaticBrainInjury>
