# Supplementary material
Source: PubMed Central journal article supplement (PMC4790794)
Supplement: denj009152.ww1_default.pdf [file denj009152.ww1_default.pdf]

**Supplementary Figure 1.** Annual rate of total cycling injury hospitalizations, 1994 to 2008 (A) in Canadian provinces and territories; and (B) in Canadian provinces and territories grouped by bicycle helmet legislation status. Rates are connected by a LOESS regression line. Vertical bars indicate the year in which legislation was enacted. Legislation in Ontario and Alberta targeted only cyclists less than 18 years of age.

**Supplementary Figure 2.** Change in the rate of head injury hospitalizations (excluding face injuries) per injured cyclist among cyclists less than 18 years of age one year after the implementation of bicycle helmet legislation. Rate ratios less than one suggest a protective effect of helmet legislation. The area of the square is proportionate to the weight of each province in the summary estimate

**Supplementary Figure 3.** Change in the rate of head injury hospitalizations (excluding face injuries) per injured cyclist among cyclists 18 years of age and older one year after the implementation of bicycle helmet legislation. Rate ratios less than one suggest a protective effect of helmet legislation. The area of the square is proportionate to the weight of each province in the summary estimate
