# Supplementary material
Source: PubMed Central journal article supplement (PMC4790794)

# Supplementary Figure 1

## A

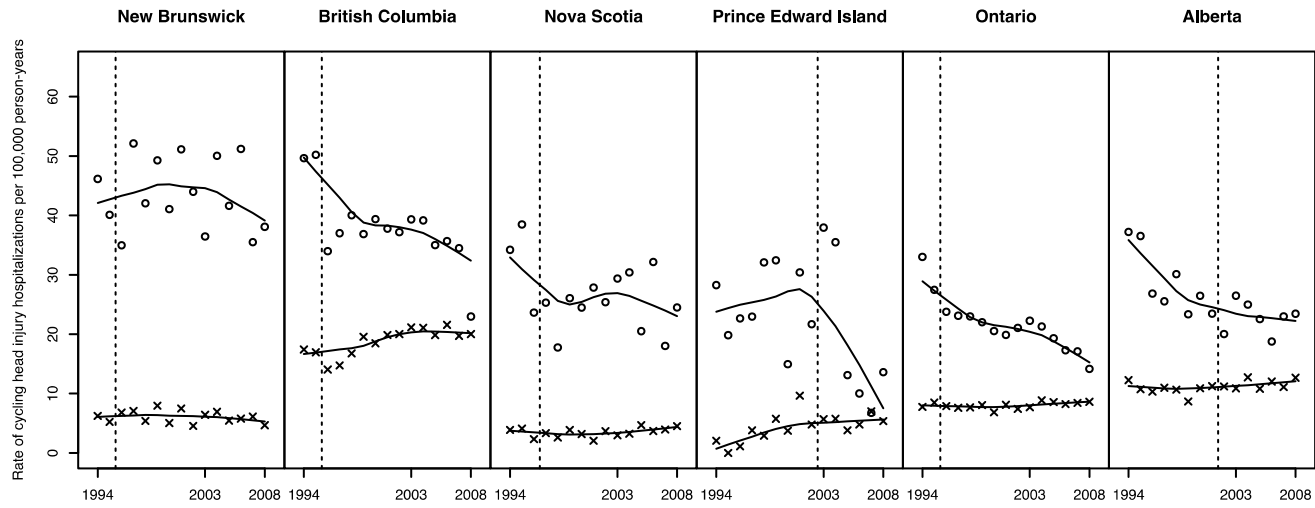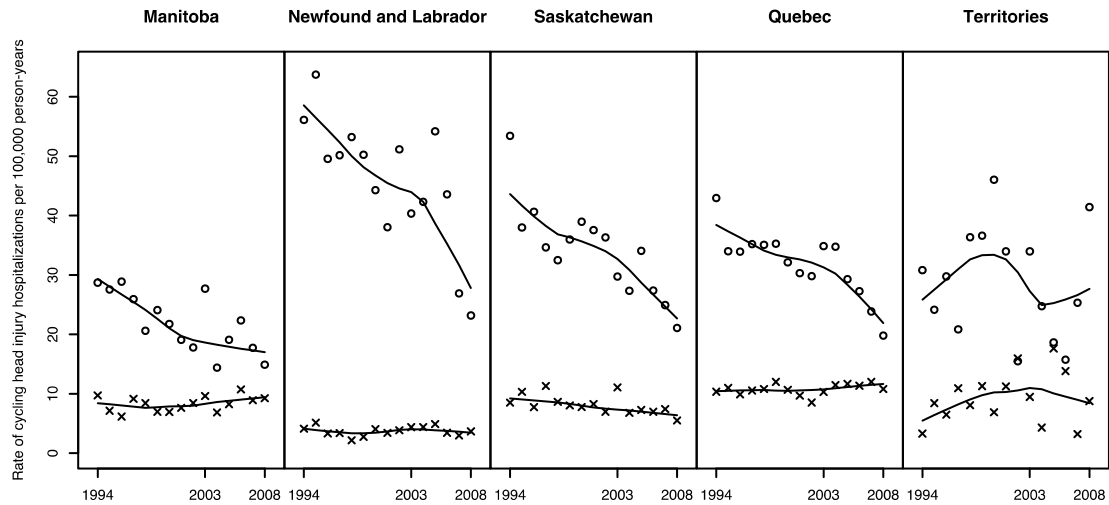

○ <18 Years of Age  
 × 18+ Years of Age

## B

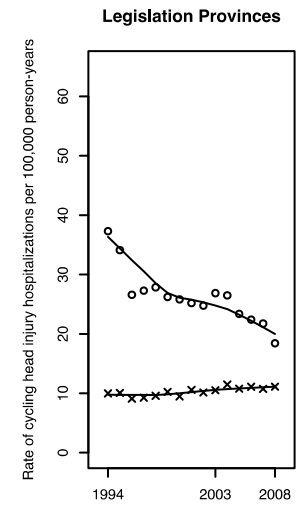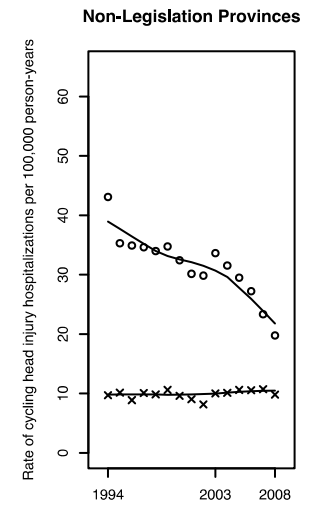

○ <18 Years of Age  
 × 18+ Years of Age

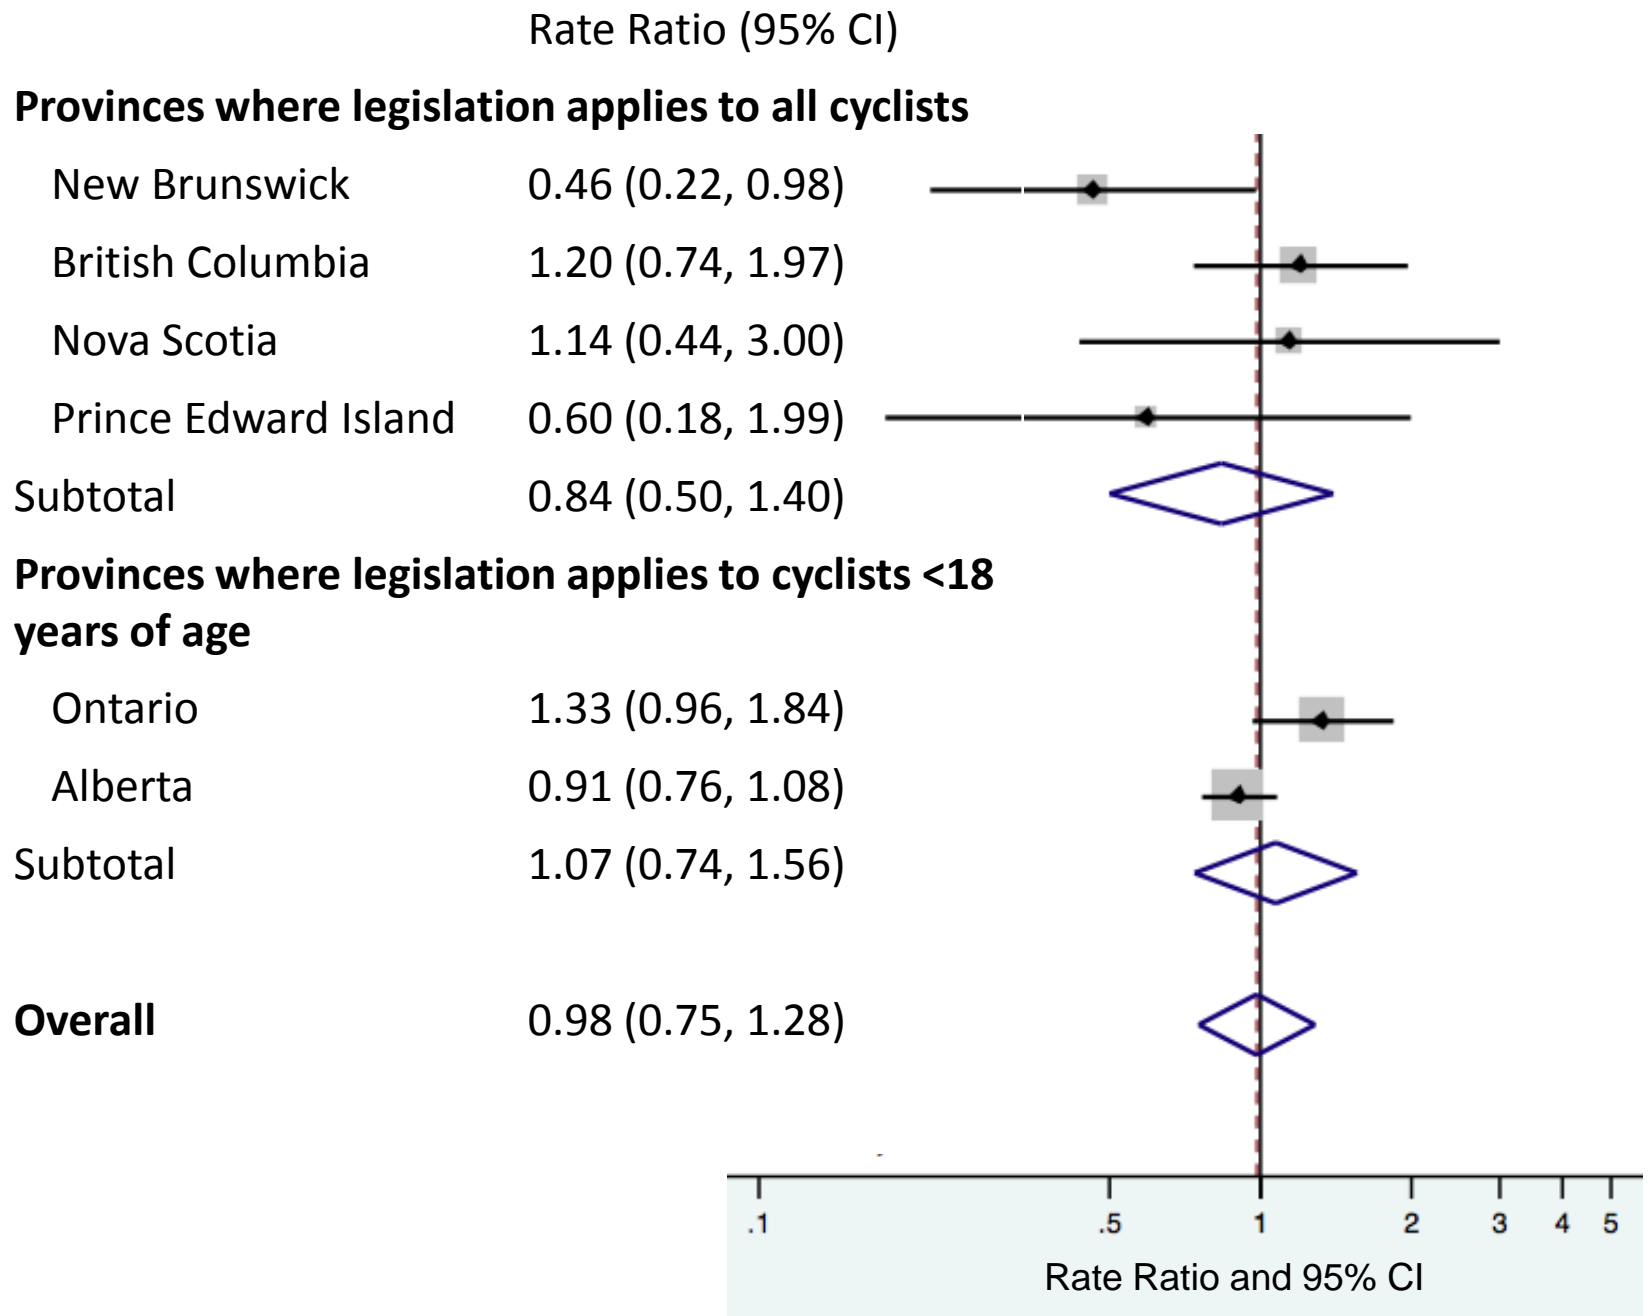

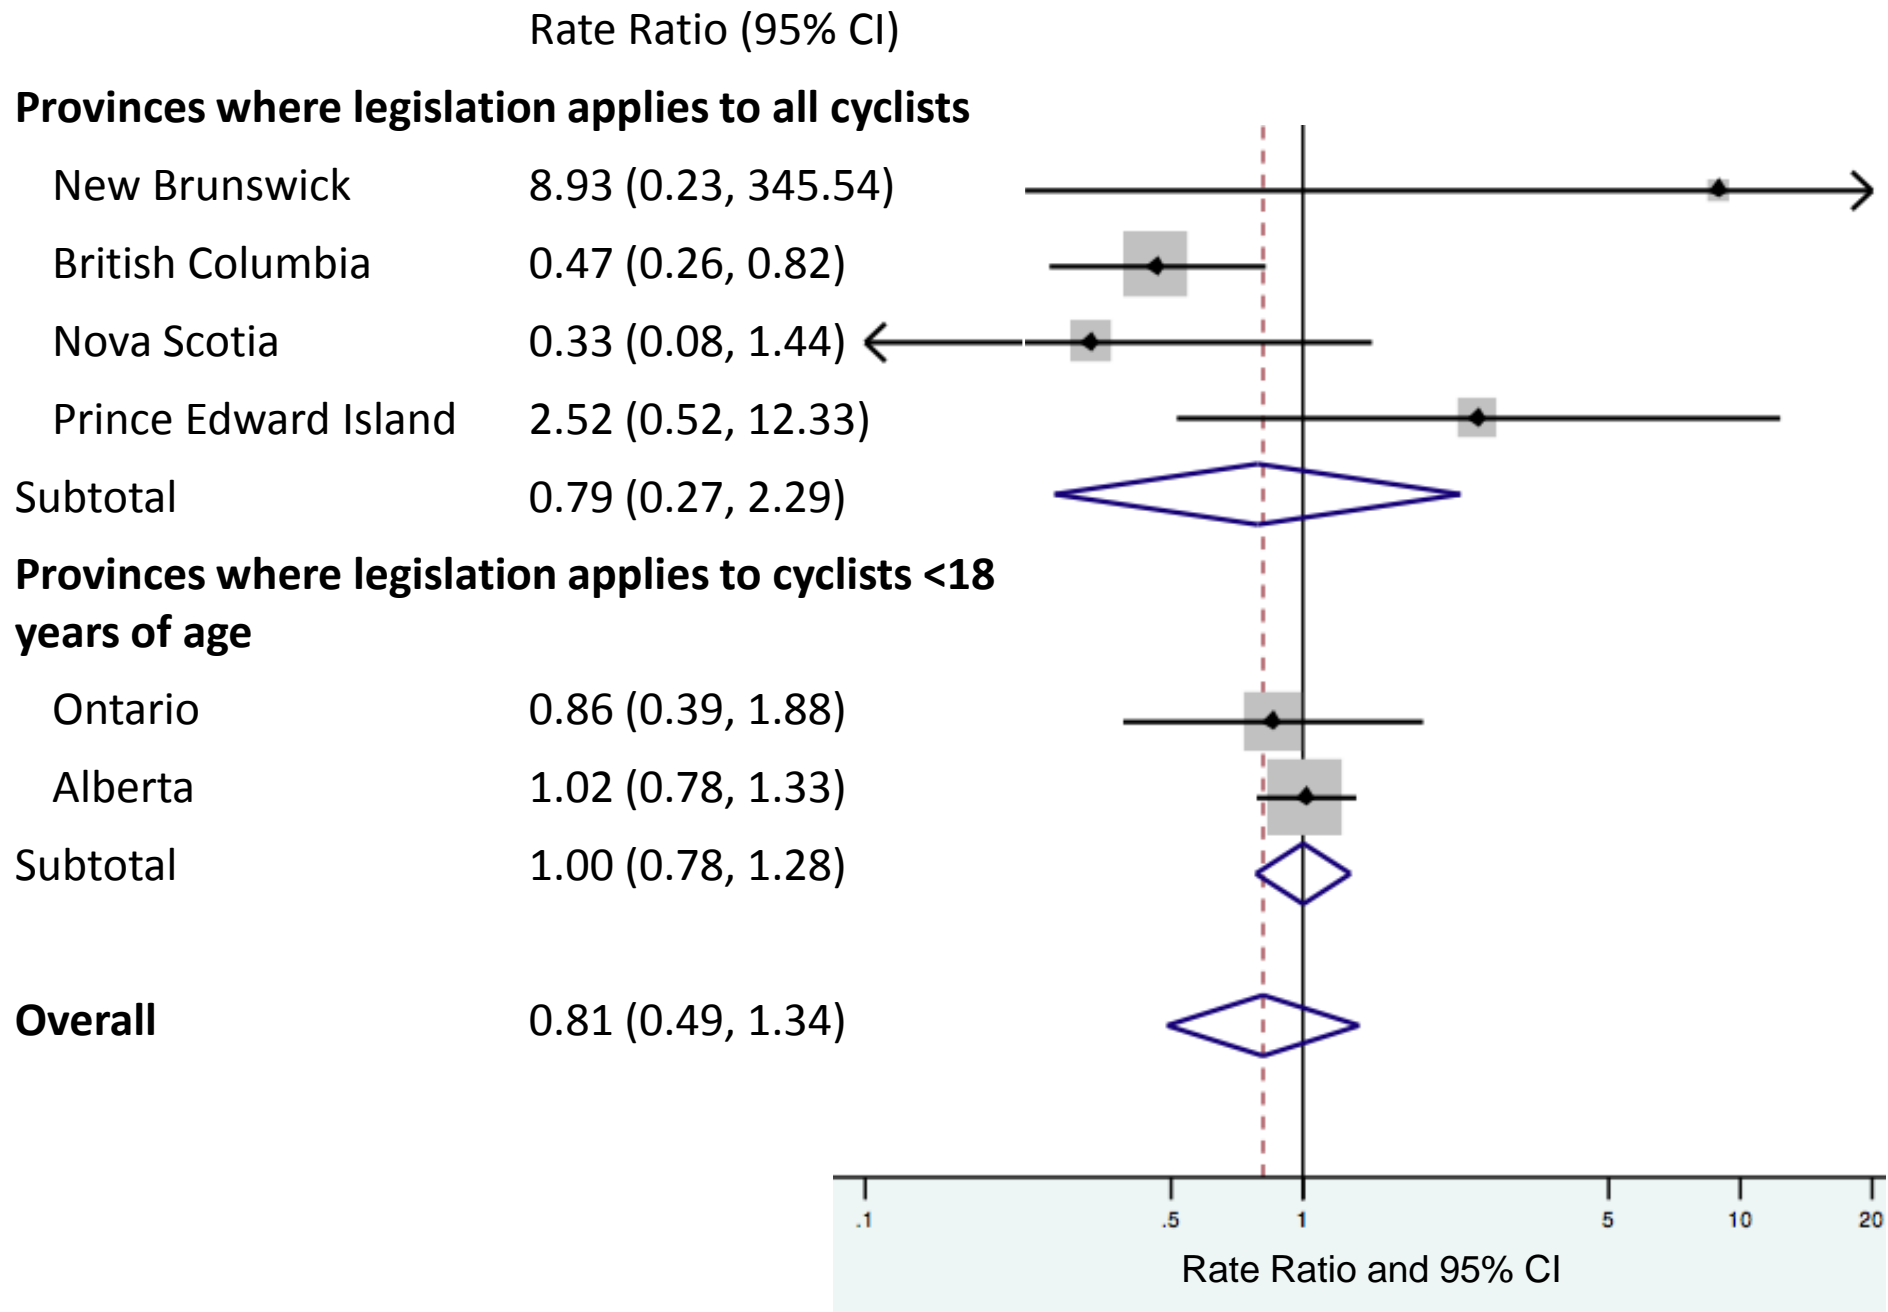

Supplement: denj009152.wf1_default.pdf [file denj009152.wf1_default.pdf]
